# Supplementary material for: Does Emotional Working Memory Training Ameliorate Anxiety and Depression? A Meta-Analytic Review
Source: MDPI journal article supplement (doi:10.3390/brainsci16010030), 2025-12-25
Supplement: s1 [file Figure S1 Funnel Plots for Meta-Analyses.pdf › brainsci-4058290-supplementary/Figure S1 Funnel Plots for Meta-Analyses.pdf]

Figure S1: Funnel Plots for Meta-Analyses

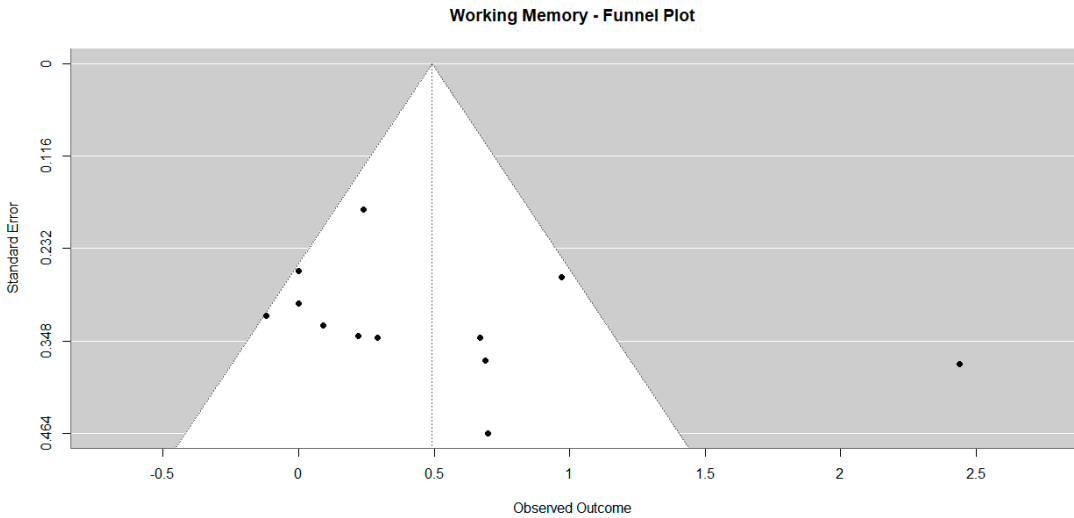

Figure S1. Funnel plots for eWMT on working memory capacity
