# Supplementary material for: Does Emotional Working Memory Training Ameliorate Anxiety and Depression? A Meta-Analytic Review
Source: MDPI journal article supplement (doi:10.3390/brainsci16010030), 2025-12-25
Supplement: s1 [file Table S1 The specific search strings.pdf › brainsci-4058290-supplementary/Table S1 The specific search strings.pdf]

**Table S1: The specific search strings**

| <b>Database</b>       | <b>search strings</b>                                                                                                                                                                                                                                                                                                                                                       |
|-----------------------|-----------------------------------------------------------------------------------------------------------------------------------------------------------------------------------------------------------------------------------------------------------------------------------------------------------------------------------------------------------------------------|
| <b>Web of science</b> | ((AB=(emotional OR affective)) OR (TI=(emotional OR affective))) AND ((AB=(working memory training OR n-back training OR memory updating training OR switching training OR shifting training OR dualtasking training)) OR (TI=(working memory training OR n-back training OR memory updating training OR switching training OR shifting training OR dualtasking training))) |
| <b>Pubmed</b>         | ((("Emotions"[Mesh]) OR (affective [Title/Abstract]))) AND ((working memory training[Title/Abstract]) OR (n-back training[Title/Abstract]) OR (memory updating training[Title/Abstract]) OR (switching training[Title/Abstract]) OR (shifting training[Title/Abstract]) OR (dualtasking training[Title/Abstract])))                                                         |
| <b>PsycINFO</b>       | (TI (affective OR emotional ) OR AB ( affective OR emotional ) )AND (TI (working memory training OR n-back training OR memory updating training OR switching training OR shifting training OR dual tasking training ) OR AB ( working memory training OR n-back training OR memory updating training OR switching training OR shifting training OR dual tasking training )) |
| <b>Science Direct</b> | Title, abstract or author-specified keywords:( affective OR emotional ) AND "working memory" AND training                                                                                                                                                                                                                                                                   |
